# Supplementary material for: Volatile composition, antidiabetic, and anti-obesity potential of Brassica incana leaf and flowering top extracts
Source: PubMed Central journal article supplement (PMC9559316; doi:10.1080/13880209.2022.2128825), 2022-10-11
Supplement: IPHB_A_2128825_SM1644.pdf [file IPHB_A_2128825_SM1644.pdf]

1  
2  
3  
4  
5  
6  
7  
8  
9  
10  
11  
12  
13  
14  
15  
16  
17  
18  
19  
20  
21  
22  
23  
24  
25  
26  
27  
28  
29  
30  
31  
32  
33  
34  
35  
36  
37  
38  
39  
40  
41  
42  
43  
44  
45  
46  
47  
48  
49  
50  
51  
52  
53  
54  
55  
56  
57  
58  
59  
60

Fluorescent intensity of BSA alone, and BSA+fructose, and BSA+ fructose+treatments (F: flowering top; L:leaf; concentrations expressed in  $\mu\text{g/mL}$ )

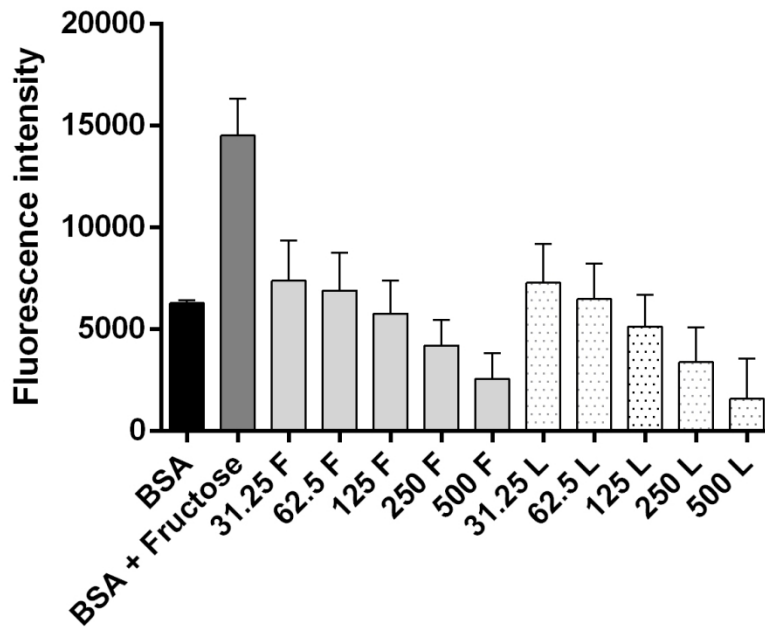

124x106mm (300 x 300 DPI)
